# Supplementary material for: The SARS-CoV-2-Inactivating Activity of Hydroxytyrosol-Rich Aqueous Olive Pulp Extract (HIDROX®) and Its Use as a Virucidal Cream for Topical Application
Source: PubMed Central journal article supplement (PMC7913061; doi:10.3390/v13020232), 2021-02-02
Supplement: viruses-13-00232-s001.pdf [file viruses-13-00232-s001.pdf]

## Supplementary Materials

**Table S1.** Information of recombinant proteins and antibodies

| Recombinant proteins                                                              | First antibody for WB                                                                  | Secondary antibody for WB                                       |
|-----------------------------------------------------------------------------------|----------------------------------------------------------------------------------------|-----------------------------------------------------------------|
| SARS-CoV-2 (2019-nCoV) Spike S1-His Recombinant Protein [Catalog No. 40591-V08H]* | SARS-CoV-2/2019-nCoV Spike Antibody, Rabbit PAb [Catalog No. 40591]*                   | Mouse anti-rabbit IgG peroxidase conjugate [Catalog No. A1949]‡ |
| Recombinant 2019-nCoV Spike Protein (RBD, mFc Tag) [Catalog No. PKSR030500]†      | SARS-CoV-2 Spike RBD Polyclonal Antibody [Catalog No. E-AB-V1006]†                     |                                                                 |
| SARS-CoV-2 (2019-nCoV) Spike Protein (S2 ECD, His tag) [Catalog No. 40590-V08B]*  | SARS-CoV-2/2019-nCoV Spike/S2 Antibody, Rabbit PAb [Catalog No. 40590-T62]*            |                                                                 |
| SARS-CoV-2 (2019-nCoV) Nucleocapsid Protein (His tag) [Catalog No. 40588-V08B]*   | SARS-CoV-2 (2019-nCoV) Nucleoprotein/NP Antibody, Rabbit Mab [Catalog No. 40143-R019]* |                                                                 |

\*Purchased from Sino Biological Inc., Beijing, China

†Purchased from Elabscience Biotechnology Inc., TX, USA

‡Purchased from Sigma-Aldrich, Inc., Saint Louis, MO, USA

The data presented in this study

Figure 1A

|  |                         | 0.5 h    |           |           |            | 1 h      |           |           |            |
|--|-------------------------|----------|-----------|-----------|------------|----------|-----------|-----------|------------|
|  |                         | HIDROX   |           |           |            | HIDROX   |           |           |            |
|  |                         | PBS      | 4.5 mg/ml | 0.9 mg/ml | 0.45 mg/ml | PBS      | 4.5 mg/ml | 0.9 mg/ml | 0.45 mg/ml |
|  | tube 1                  | 6.25     | 4.25      | 6.25      | 5.75       | 7.25     | 2.75      | 5.25      | 5.75       |
|  | tube 2                  | 6.75     | 3.75      | 5.75      | 6.25       | 6.75     | 2.25      | 4.75      | 5.75       |
|  | tube 3                  | 7.25     | 4.75      | 5.25      | 6.25       | 6.75     | 3.25      | 5.25      | 6.25       |
|  | mean                    | 6.75     | 4.25      | 5.75      | 6.083333   | 6.916667 | 2.75      | 5.083333  | 5.916667   |
|  | stdev                   | 0.5      | 0.5       | 0.5       | 0.288675   | 0.288675 | 0.5       | 0.288675  | 0.288675   |
|  | PBS group – test group  |          | 2.5       | 1         | 0.666667   |          | 4.166667  | 1.833333  | 1          |
|  | Virus inactivation rate |          | 99.68377  | 90        | 78.45565   |          | 99.99319  | 98.5322   | 90         |
|  |                         |          |           |           |            |          |           |           |            |
|  |                         | 3 h      |           |           |            | 6 h      |           |           |            |
|  |                         | HIDROX   |           |           |            | HIDROX   |           |           |            |
|  |                         | PBS      | 4.5 mg/ml | 0.9 mg/ml | 0.45 mg/ml | PBS      | 4.5 mg/ml | 0.9 mg/ml | 0.45 mg/ml |
|  | tube 1                  | 6.25     | 2.25      | 3.75      | 5.25       | 6.25     | 2.25      | 3.25      | 4.25       |
|  | tube 2                  | 6.25     | 2.25      | 3.25      | 5.25       | 5.75     | 2.25      | 3.25      | 4.75       |
|  | tube 3                  | 6.75     | 2.25      | 3.75      | 5.75       | 6.25     | 2.25      | 3.25      | 5.25       |
|  | mean                    | 6.416667 | 2.25      | 3.583333  | 5.416667   | 6.083333 | 2.25      | 3.25      | 4.75       |
|  | stdev                   | 0.288675 | 0         | 0.288675  | 0.288675   | 0.288675 | 0         | 0         | 0.5        |
|  | PBS group – test group  |          | 4.166667  | 2.833333  | 1          |          | 3.833333  | 2.833333  | 1.333333   |
|  | Virus inactivation rate |          | 99.99319  | 99.85322  | 90         |          | 99.98532  | 99.85322  | 95.35841   |
|  |                         |          |           |           |            |          |           |           |            |
|  |                         | 24 h     |           |           |            |          |           |           |            |
|  |                         | HIDROX   |           |           |            |          |           |           |            |
|  |                         | PBS      | 4.5 mg/ml | 0.9 mg/ml | 0.45 mg/ml |          |           |           |            |
|  | tube 1                  | 6.25     | 2.25      | 2.25      | 3.75       |          |           |           |            |
|  | tube 2                  | 5.75     | 2.25      | 2.25      | 4.25       |          |           |           |            |
|  | tube 3                  | 6.25     | 2.25      | 2.25      | 3.75       |          |           |           |            |
|  | mean                    | 6.083333 | 2.25      | 2.25      | 3.916667   |          |           |           |            |
|  | stdev                   | 0.288675 | 0         | 0         | 0.288675   |          |           |           |            |
|  | PBS group – test group  |          | 3.833333  | 3.833333  | 2.166667   |          |           |           |            |
|  | Virus inactivation rate |          | 99.98532  | 99.98532  | 99.31871   |          |           |           |            |

**Figure 1B**

|  |  |                         | 5 min    |           |             |  |
|--|--|-------------------------|----------|-----------|-------------|--|
|  |  |                         |          | HIDROX    |             |  |
|  |  |                         | PBS      | 5.63 mg/m | 11.25 mg/ml |  |
|  |  | tube 1                  | 5.25     | 4.75      | 4.25        |  |
|  |  | tube 2                  | 5.75     | 4.25      | 4.25        |  |
|  |  | tube 3                  | 6.25     | 5.25      | 4.25        |  |
|  |  | tube 4                  | 5.25     | 4.75      | 4.25        |  |
|  |  | mean                    | 5.625    | 4.75      | 4.25        |  |
|  |  | stdev                   | 0.478714 | 0.408248  | 0           |  |
|  |  | PBS group – test group  |          | 0.875     | 1.375       |  |
|  |  | Virus inactivation rate |          | 86.66479  | 95.78303    |  |
|  |  |                         |          |           |             |  |

**Figure 2**

|                         |        | <b>3 h</b>  |                  |              |               |
|-------------------------|--------|-------------|------------------|--------------|---------------|
|                         |        | PBS         | 0.9 mg/ml HIDROX | 0.9 mg/ml HT | 0.05 mg/ml HT |
|                         | tube 1 | 5.75        | 3.25             | 5.75         | 5.25          |
|                         | tube 2 | 5.75        | 3.25             | 4.25         | 5.25          |
|                         | tube 3 | 5.25        | 3.25             | 4.75         | 5.25          |
|                         | tube 4 | 5.75        | 3.75             | 5.25         | 5.25          |
|                         | mean   | 5.625       | 3.375            | 5            | 5.25          |
|                         | stdev  | 0.25        | 0.25             | 0.645497224  | 0             |
| PBS group – test group  |        |             | 2.25             | 0.625        | 0.375         |
| Virus inactivation rate |        |             | 99.43765867      | 76.28626294  | 57.83034966   |
|                         |        |             |                  |              |               |
|                         |        | <b>24 h</b> |                  |              |               |
|                         |        | PBS         | 0.9 mg/ml HIDROX | 0.9 mg/ml HT | 0.05 mg/ml HT |
|                         | tube 1 | 5.75        | ≤2.25            | ≤2.25        | 4.75          |
|                         | tube 2 | 5.75        | ≤2.25            | ≤2.25        | 5.25          |
|                         | tube 3 | 6.25        | ≤2.25            | ≤2.25        | 5.25          |
|                         | tube 4 | 5.75        | ≤2.25            | ≤2.25        | 5.75          |
|                         | mean   | 5.875       | ≤2.25            | ≤2.25        | 5.25          |
|                         | stdev  | 0.25        | 0                | 0            | 0.40824829    |
| PBS group – test group  |        |             | ≥3.625           | ≥3.625       | 0.625         |
| Virus inactivation rate |        |             | ≥99.976          | ≥99.976      | 76.28626294   |

**Figure 3A**

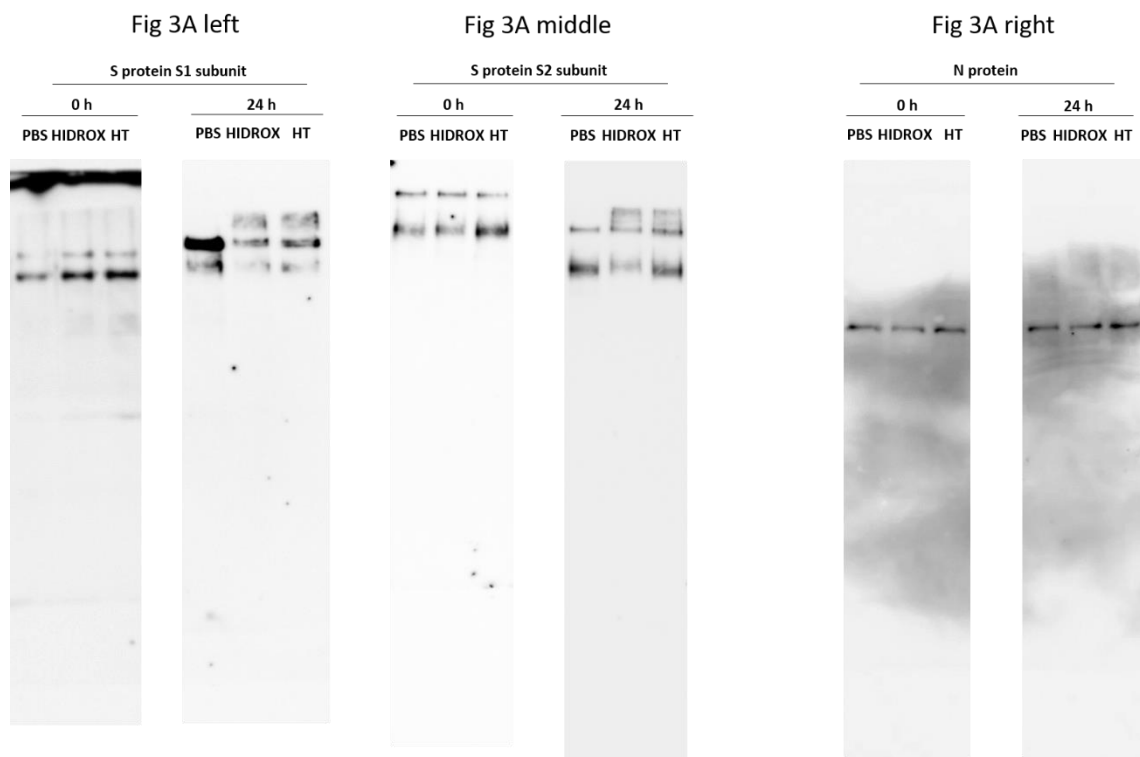

## Figure 3B

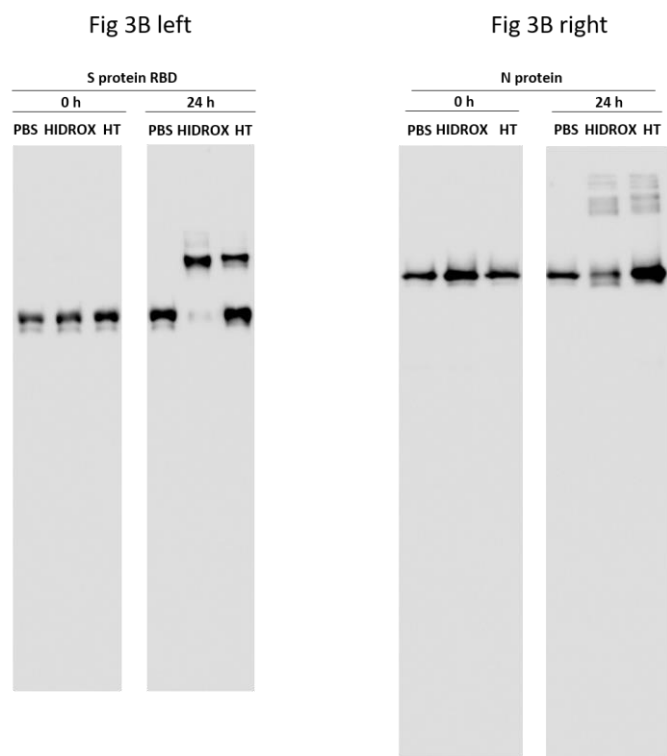

## Figure 4

Fig 4 left

| S protein S1 subunit |           |                |           |
|----------------------|-----------|----------------|-----------|
| Glycosylated         |           | Deglycosylated |           |
| PBS                  | HIDROX HT | PBS            | HIDROX HT |

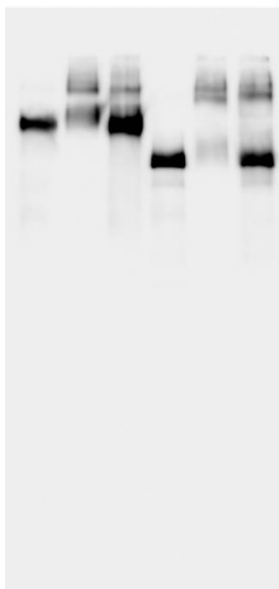

Fig 4 middle

| RBD          |           |                |           |
|--------------|-----------|----------------|-----------|
| Glycosylated |           | Deglycosylated |           |
| PBS          | HIDROX HT | PBS            | HIDROX HT |

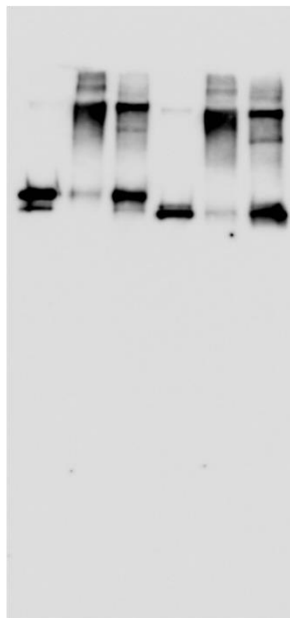

Fig 4 right

| S protein S2 subunit |           |                |           |
|----------------------|-----------|----------------|-----------|
| Glycosylated         |           | Deglycosylated |           |
| PBS                  | HIDROX HT | PBS            | HIDROX HT |

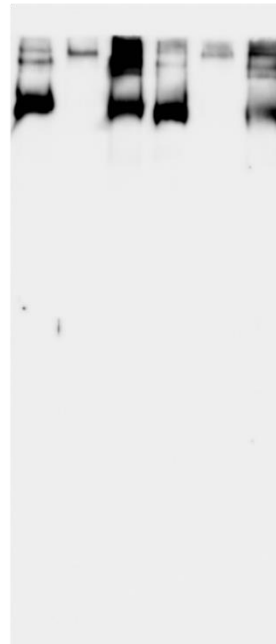

**Figure 5**

|                        |        | <b>0 h</b>  |                    |                |
|------------------------|--------|-------------|--------------------|----------------|
|                        |        | PBS         | HIDROX (0.9 mg/ml) | HT (0.9 mg/ml) |
|                        | Tube 1 | 24.798      | 24.566             | 24.092         |
|                        | Tube 2 | 26.531      | 23.468             | 23.949         |
|                        | Tube 3 | 23.487      | 24.589             | 25.082         |
|                        | Tube 4 | 24.495      | 24.384             | 23.903         |
|                        | mean   | 24.82775    | 24.25175           | 24.2565        |
|                        | STDEV  | 1.266265    | 0.530485548        | 0.55618612     |
| PBS group – test group |        |             | 0.576              | 0.57125        |
|                        |        |             |                    |                |
|                        |        |             |                    |                |
|                        |        |             |                    |                |
|                        |        | <b>24 h</b> |                    |                |
|                        |        | PBS         | HIDROX (0.9 mg/ml) | HT (0.9 mg/ml) |
|                        | Tube 1 | 23.868      | 26.611             | 26.921         |
|                        | Tube 2 | 23.505      | 27.218             | 27.24          |
|                        | Tube 3 | 23.457      | 26.844             | 26.154         |
|                        | Tube 4 | 25.002      | 27.922             | 26.021         |
|                        | mean   | 23.958      | 27.14875           | 26.584         |
|                        | STDEV  | 0.719779    | 0.572933606        | 0.590416237    |
| PBS group – test group |        |             | -3.19075           | -2.626         |



**Figure 6**

| 10 min                       |          |          |          |          | 30 min |          |          |          |           | 1 h    |         |          |          |          |
|------------------------------|----------|----------|----------|----------|--------|----------|----------|----------|-----------|--------|---------|----------|----------|----------|
| HIDROX                       |          |          |          |          | HIDROX |          |          |          |           | HIDROX |         |          |          |          |
|                              | 0%       | 2%       | 5%       | 10%      |        | 0%       | 2%       | 5%       | 10%       |        | 0%      | 2%       | 5%       | 10%      |
| tube 1                       | 5.25     | 4.75     | 4.75     | 4.25     | tube 1 | 5.25     | 3.75     | 2.75     | ≤1.25     | tube 1 | 5.25    | 3.25     | 3.25     | ≤1.25    |
| tube 2                       | 4.25     | 4.75     | 4.25     | 3.75     | tube 2 | 4.75     | 3.75     | 2.25     | 2.75      | tube 2 | 5.25    | 2.75     | ≤1.75    | ≤1.25    |
| tube 3                       | 5.25     | 4.75     | 4.75     | 3.75     | tube 3 | 5.75     | 3.75     | 2.75     | 2.75      | tube 3 | 4.75    | 3.25     | 2.25     | ≤1.25    |
| tube 4                       | 4.75     | 4.75     | 4.25     | 3.25     | tube 4 | 5.25     | 4.25     | 3.75     | ≤1.75     | tube 4 | 6.25    | 2.75     | ≤1.25    | ≤1.75    |
| tube 5                       | 6.25     | 4.25     | 4.25     | 3.75     | tube 5 | 4.25     | 4.75     | 4.25     | 3.25      | tube 5 | 5.25    | 4.25     | 2.75     | 2.25     |
| tube 6                       | 5.25     | 4.25     | 4.25     | 3.75     | tube 6 | 5.25     | 3.75     | 3.75     | 3.25      | tube 6 | 5.25    | 4.25     | 2.25     | ≤1.75    |
| tube 7                       | 4.75     | 5.25     | 4.75     | 3.75     | tube 7 | 6.25     | 3.75     | 3.75     | 3.25      | tube 7 | 4.75    | 3.75     | 2.75     | 2.75     |
| tube 8                       | 4.75     | 4.25     | 3.75     | 4.25     | tube 8 | 5.25     | 4.25     | 3.75     | 3.75      | tube 8 | 5.25    | 3.75     | 2.25     | 2.25     |
| mean                         | 5.0625   | 4.625    | 4.375    | 3.8125   |        | 5.25     | 4        | 3.375    | ≤2.75     |        | 5.25    | 3.5      | ≤2.3125  | ≤1.8125  |
| stdev                        | 0.593867 | 0.353553 | 0.353553 | 0.320435 |        | 0.597614 | 0.377964 | 0.694365 | 0.3763863 |        | 0.46291 | 0.597614 | 0.408248 | 0.288675 |
| 0% HIDROX group - test group |          | 0.4375   | 0.6875   | 1.25     |        |          | 1.25     | 1.875    | ≥2.5      |        |         | 1.75     | ≥2.9375  | ≥3.4375  |
| Virus inactivation rate      |          | 63.48259 | 79.46475 | 94.37659 |        |          | 94.37659 | 98.66648 | ≥99.684   |        |         | 98.22172 | ≥99.885  | ≥99.964  |
| 3 h                          |          |          |          |          | 6 h    |          |          |          |           |        |         |          |          |          |
| HIDROX                       |          |          |          |          | HIDROX |          |          |          |           |        |         |          |          |          |
|                              | 0%       | 2%       | 5%       | 10%      |        | 0%       | 2%       | 5%       | 10%       |        |         |          |          |          |
| tube 1                       | 5.75     | ≤1.25    | ≤1.25    | ≤1.25    | tube 1 | 4.75     | ≤1.25    | ≤1.25    | ≤1.25     |        |         |          |          |          |
| tube 2                       | 5.25     | ≤1.25    | ≤1.25    | ≤1.25    | tube 2 | 5.25     | ≤1.25    | ≤1.25    | ≤1.25     |        |         |          |          |          |
| tube 3                       | 5.25     | ≤1.25    | ≤1.25    | ≤1.25    | tube 3 | 5.25     | ≤1.25    | ≤1.25    | ≤1.25     |        |         |          |          |          |
| tube 4                       | 5.75     | ≤1.25    | ≤1.25    | ≤1.25    | tube 4 | 4.25     | ≤1.25    | ≤1.25    | ≤1.25     |        |         |          |          |          |
| tube 5                       | 4.75     | 2.25     | ≤1.25    | ≤1.25    | tube 5 |          |          |          |           |        |         |          |          |          |
| tube 6                       | 4.75     | 2.25     | ≤1.25    | ≤1.25    | tube 6 |          |          |          |           |        |         |          |          |          |
| tube 7                       |          |          |          |          | tube 7 |          |          |          |           |        |         |          |          |          |
| tube 8                       |          |          |          |          | tube 8 |          |          |          |           |        |         |          |          |          |
| mean                         | 5.25     | ≤1.5833  | ≤1.25    | ≤1.25    |        | 4.875    | ≤1.25    | ≤1.25    | ≤1.25     |        |         |          |          |          |
| stdev                        | 0.447214 | 0.516398 | 0        | 0        |        | 0.478714 | 0        | 0        | 0         |        |         |          |          |          |
| 0% HIDROX group - test group |          | ≥3.667   | ≥4       | ≥4       |        |          | ≥3.625   | ≥3.625   | ≥3.625    |        |         |          |          |          |
| Virus inactivation rate      |          | ≥99.979  | ≥99.99   | ≥99.99   |        |          | ≥99.976  | ≥99.976  | ≥99.976   |        |         |          |          |          |
